# Supplementary material
Source: MDPI journal article supplement (https://www.mdpi.com/2073-4468/11/2/42)
Supplement: s1 [file s1]

**A Simple Method for the Prediction of Human Concentration-Time profiles and Pharmacokinetics of  
Antibody-Drug Conjugates (ADC) from Rat or Monkey**

**IFTEKHAR MAHMOOD, Ph. D.**

Mahmood Clinical Pharmacology Consultancy, LLC.

e-mail: IftekharMahmood@aol.com

Phone: 301-838-4555

**Table S1: Predicted and observed (human) pharmacokinetic parameters of Lifastuzumab vedotin from monkey and rat**

| Parameters                                                    | Human<br>Observed | V = 1.0 | V = 0.9 | V = 0.8 | V = 1.0<br>CL = 0.85 | V = 0.9<br>CL = 0.85 | V = 0.8<br>CL = 0.85 | V = 1.0<br>V = 0.8 | V = 0.9<br>V = 0.8 | 1 species<br>scaling |
|---------------------------------------------------------------|-------------------|---------|---------|---------|----------------------|----------------------|----------------------|--------------------|--------------------|----------------------|
| <b>From monkey 1 mg/kg to 2.4 mg/kg human; Total antibody</b> |                   |         |         |         |                      |                      |                      |                    |                    |                      |
| AUC                                                           | 261               | 157     | 212     | 286     | 88                   | 119                  | 160                  | 179                | 225                | 272                  |
| Ratio                                                         |                   | 0.60    | 0.81    | 1.10    | 0.34                 | 0.45                 | 0.61                 | 0.69               | 0.86               | 1.05                 |
| Clearance                                                     | 9.2               | 15.3    | 11.3    | 8.4     | 27.3                 | 20.2                 | 15.0                 | 13.4               | 10.7               | 8.8                  |
| Ratio                                                         |                   | 1.66    | 1.23    | 0.91    | 2.97                 | 2.20                 | 1.63                 | 1.45               | 1.16               | 0.96                 |
| Half-life                                                     | 6.9               | 6.9     | 6.9     | 6.9     | 6.9                  | 6.9                  | 6.9                  | 11.2               | 8.5                | 13.0                 |
| Ratio                                                         |                   | 1.00    | 1.00    | 1.00    | 1.00                 | 1.00                 | 1.00                 | 1.62               | 1.23               | 1.88                 |
| <b>From rat 5 mg/kg to 2.4 mg/kg human; Total Antibody</b>    |                   |         |         |         |                      |                      |                      |                    |                    |                      |
| AUC                                                           | 261               | 104     | 182     | 320     | 50                   | 87                   | 153                  | 146                | 209                | 348                  |
| Ratio                                                         |                   | 0.40    | 0.70    | 1.23    | 0.19                 | 0.33                 | 0.59                 | 0.56               | 0.80               | 1.33                 |
| Clearance                                                     | 9.2               | 23.1    | 13.2    | 7.5     | 48.3                 | 27.5                 | 15.6                 | 16.5               | 11.5               | 6.9                  |
| Ratio                                                         |                   | 2.52    | 1.43    | 0.82    | 5.25                 | 2.99                 | 1.70                 | 1.79               | 1.25               | 0.75                 |
| Half-life                                                     | 6.9               | 7.9     | 7.9     | 7.9     | 7.9                  | 7.9                  | 7.9                  | 48.4               | 13.6               | 23.1                 |
| Ratio                                                         |                   | 1.15    | 1.15    | 1.15    | 1.15                 | 1.15                 | 1.15                 | 7.01               | 1.98               | 3.35                 |

The units of AUC, CL, and half-life are  $\mu\text{g}\cdot\text{day}/\text{mL}$ ,  $\text{mL}/\text{day}/\text{kg}$ , and days, respectively.

The reported literature values for total antibodies were for AUC =  $217 \mu\text{g}\cdot\text{day}/\text{mL}$ , CL =  $11.6 \text{ mL}/\text{day}/\text{kg}$ ; and half-life = 7.5 days, respectively.

Human observed values in the second column is based on digitally extracted human concentration-time data from the reported plots in the literature.

**Table S2: Predicted and observed (human) pharmacokinetic parameters of PF-06263507 (anti-5T4) from monkey**

| Parameters                                                  | Human<br>Observed | V = 1.0 | V = 0.9 | V = 0.8 | V = 1.0<br>CL = 0.85 | V = 0.9<br>CL = 0.85 | V = 0.8<br>CL = 0.85 | V = 1.0<br>V = 0.8 | V = 0.9<br>V = 0.8 | 1 species<br>scaling |
|-------------------------------------------------------------|-------------------|---------|---------|---------|----------------------|----------------------|----------------------|--------------------|--------------------|----------------------|
| <b>From monkey 3 mg/kg to 4.34 mg/kg human; PF-06263507</b> |                   |         |         |         |                      |                      |                      |                    |                    |                      |
| AUC                                                         | 404               | 229     | 309     | 416     | 138                  | 186                  | 251                  | 416                | 320                | 442                  |
| Ratio                                                       |                   | 0.57    | 0.76    | 1.03    | 0.34                 | 0.46                 | 0.62                 | 1.03               | 0.79               | 1.10                 |
| Clearance                                                   | 10.8              | 19.0    | 14.1    | 10.4    | 31.4                 | 23.3                 | 17.3                 | 10.4               | 13.6               | 9.8                  |
| Ratio                                                       |                   | 1.76    | 1.30    | 0.97    | 2.91                 | 2.16                 | 1.60                 | 0.97               | 1.26               | 0.91                 |
| Half-life                                                   | 4.6               | 4.0     | 4.0     | 4.0     | 4.0                  | 4.0                  | 4.0                  | 4.0                | 4.5                | 6.4                  |
| Ratio                                                       |                   | 0.86    | 0.86    | 0.86    | 0.86                 | 0.86                 | 0.86                 | 0.86               | 0.98               | 1.39                 |
| <b>From monkey 3 mg/kg to 4.34 mg/kg human; Total</b>       |                   |         |         |         |                      |                      |                      |                    |                    |                      |
| AUC                                                         | 646               | 506     | 682     | 921     | 305                  | 412                  | 556                  | 742                | 793                | 835                  |
| Ratio                                                       |                   | 0.78    | 1.06    | 1.43    | 0.47                 | 0.64                 | 0.86                 | 1.15               | 1.23               | 1.29                 |
| Clearance                                                   | 6.7               | 8.6     | 6.4     | 4.7     | 14.2                 | 10.5                 | 7.8                  | 5.8                | 5.5                | 5.2                  |
| Ratio                                                       |                   | 1.28    | 0.95    | 0.70    | 2.12                 | 1.57                 | 1.17                 | 0.87               | 0.82               | 0.78                 |
| Half-life                                                   | 7.3               | 7.8     | 7.8     | 7.8     | 7.8                  | 7.8                  | 7.8                  | 14.5               | 10.1               | 9.4                  |
| Ratio                                                       |                   | 1.06    | 1.06    | 1.06    | 1.06                 | 1.06                 | 1.06                 | 1.99               | 1.39               | 1.29                 |
| <b>From monkey 3 mg/kg to 4.34 mg/kg human; payload</b>     |                   |         |         |         |                      |                      |                      |                    |                    |                      |
| AUC                                                         | 12.9              | 3.7     | 5.0     | 6.7     | 2.2                  | 3.0                  | 4.0                  | 3.7                | 5.0                | NA                   |
| Ratio                                                       |                   | 0.28    | 0.38    | 0.52    | 0.17                 | 0.23                 | 0.31                 | 0.28               | 0.38               | NA                   |
| Half-life                                                   | 2.6               | 3.0     | 3.0     | 3.0     | 3.0                  | 3.0                  | 3.0                  | 3.0                | 3.0                |                      |
| Ratio                                                       |                   | 1.15    | 1.15    | 1.15    | 1.15                 | 1.15                 | 1.15                 | 1.15               | 1.15               |                      |

The units of AUC, CL, and half-life are  $\mu\text{g} \cdot \text{day/mL}$ ,  $\text{mL/day/kg}$ , and days, respectively.

The reported literature PK values for total antibody were for AUC =  $418 \mu\text{g} \cdot \text{day/mL}$ , CL =  $10.0 \text{ mL/day/kg}$ ; and half-life = 6.0 days, respectively.

Only half-life of 8.8 and 3.4 days was given for total and payload, respectively.

Human observed values in the second column is based on digitally extracted human concentration-time data from the reported plots in the literature.

**Table S3: Predicted and observed (human) pharmacokinetic parameters of trastuzumab deruxtecan**

| Parameters                                                            | Human<br>Observed | V = 1.0 | V = 0.9 | V = 0.8 | V = 1.0<br>CL = 0.85 | V = 0.9<br>CL = 0.85 | V = 0.8<br>CL = 0.85 | V = 1.0<br>V = 0.8 | V = 0.9<br>V = 0.8 | 1 species<br>scaling |
|-----------------------------------------------------------------------|-------------------|---------|---------|---------|----------------------|----------------------|----------------------|--------------------|--------------------|----------------------|
| <b>From monkey 3 mg/kg to 6.4 mg/kg human; trastuzumab deruxtecan</b> |                   |         |         |         |                      |                      |                      |                    |                    |                      |
| AUC                                                                   | 1047              | 436     | 588     | 793     | 248                  | 335                  | 452                  | 436                | 610                | 719                  |
| Ratio                                                                 |                   | 0.42    | 0.56    | 0.76    | 0.24                 | 0.32                 | 0.43                 | 0.42               | 0.58               | 0.69                 |
| Clearance                                                             | 6.1               | 14.69   | 10.89   | 8.07    | 25.80                | 19.12                | 14.17                | 14.69              | 10.49              | 8.9                  |
| Ratio                                                                 |                   | 2.41    | 1.78    | 1.32    | 4.23                 | 3.13                 | 2.32                 | 2.41               | 1.72               | 1.46                 |
| Half-life                                                             | 7.2               | 4.3     | 4.3     | 4.3     | 4.3                  | 4.3                  | 4.3                  | 4.3                | 5.0                | 6.1                  |
| Ratio                                                                 |                   | 0.60    | 0.60    | 0.60    | 0.60                 | 0.60                 | 0.60                 | 0.60               | 0.69               | 0.85                 |
| <b>From monkey 8 mg/kg to 6.4 mg/kg human; DXD</b>                    |                   |         |         |         |                      |                      |                      |                    |                    |                      |
| AUC                                                                   | 35.9              | 1.2     | 1.6     | 2.2     | 0.8                  | 1.1                  | 1.5                  | 1.2                | 1.6                | NA                   |
| Ratio                                                                 |                   | 0.03    | 0.05    | 0.06    | 0.02                 | 0.03                 | 0.04                 | 0.03               | 0.05               | NA                   |
| Half-life                                                             | 5.5               | 6.3     | 6.3     | 6.3     | 6.3                  | 6.3                  | 6.3                  | 6.3                | 6.3                |                      |
| Ratio                                                                 |                   | 1.14    | 1.14    | 1.14    | 1.14                 | 1.14                 | 1.14                 | 1.14               | 1.14               |                      |

The units of AUC, CL, and half-life are  $\mu\text{g} \cdot \text{day}/\text{mL}$ ,  $\text{mL}/\text{day}/\text{kg}$ , and days, respectively.

The reported literature values for trastuzumab deruxtecan were for AUC =  $1030 \mu\text{g} \cdot \text{day}/\text{mL}$ , CL =  $6.4 \text{ mL}/\text{day}/\text{kg}$ ; and half-life = 7.3 days, respectively.

Human observed values in the second column is based on digitally extracted human concentration-time data from the reported plots in the literature.

**Table S4: Predicted and observed (human) pharmacokinetic parameters of DSTA4637S from rat**

| Parameters                                                | Human<br>Observed | V = 1.0 | V = 0.9 | V = 0.8 | V = 1.0<br>CL = 0.85 | V = 0.9<br>CL = 0.85 | V = 0.8<br>CL = 0.85 | V = 1.0<br>V = 0.8 | V = 0.9<br>V = 0.8 | 1 species<br>scaling |
|-----------------------------------------------------------|-------------------|---------|---------|---------|----------------------|----------------------|----------------------|--------------------|--------------------|----------------------|
| <b>From rat 1 mg/kg to 5 mg/kg human; Total Antibody</b>  |                   |         |         |         |                      |                      |                      |                    |                    |                      |
| AUC                                                       | 1349              | 581     | 1020    | 1792    | 196                  | 344                  | 605                  | 581                | 1353               | 1112                 |
| Ratio                                                     |                   | 0.43    | 0.76    | 1.33    | 0.15                 | 0.26                 | 0.45                 | 0.43               | 1.00               | 0.82                 |
| Clearance                                                 | 3.7               | 8.6     | 4.9     | 2.8     | 25.5                 | 14.5                 | 8.3                  | 8.6                | 3.7                | 4.5                  |
| Ratio                                                     |                   | 2.33    | 1.32    | 0.75    | 6.90                 | 3.93                 | 2.24                 | 2.33               | 1.00               | 1.22                 |
| Half-life                                                 | 12.9              | 12.2    | 12.2    | 12.2    | 12.2                 | 12.2                 | 12.2                 | 12.2               | 12.2               | 15.8                 |
| Ratio                                                     |                   | 0.94    | 0.94    | 0.94    | 0.94                 | 0.94                 | 0.94                 | 0.94               | 0.94               | 1.22                 |
| <b>From rat 1 mg/kg to 5 mg/kg human; Conjugate</b>       |                   |         |         |         |                      |                      |                      |                    |                    |                      |
| AUC                                                       | 5.8               | 2.1     | 3.7     | 6.5     | 0.7                  | 1.3                  | 2.2                  | 2.1                | 3.9                | 7.1                  |
| Ratio                                                     |                   | 0.36    | 0.64    | 1.13    | 0.12                 | 0.22                 | 0.38                 | 0.36               | 0.68               | 1.22                 |
| Clearance                                                 | 12.3              | 33.8    | 19.2    | 10.9    | 100.1                | 57.0                 | 32.4                 | 33.8               | 18.2               | 10.0                 |
| Ratio                                                     |                   | 2.75    | 1.56    | 0.89    | 8.14                 | 4.63                 | 2.64                 | 2.75               | 1.48               | 0.81                 |
| Half-life                                                 | 4.7               | 3.5     | 3.5     | 3.5     | 3.5                  | 3.5                  | 3.5                  | 3.5                | 4.6                | 6.1                  |
| Ratio                                                     |                   | 0.75    | 0.75    | 0.75    | 0.75                 | 0.75                 | 0.75                 | 0.75               | 0.97               | 1.30                 |
| <b>From rat 50 mg/kg to 150 mg/kg human; unconjugated</b> |                   |         |         |         |                      |                      |                      |                    |                    |                      |
| AUC                                                       | 21.3              | 5.9     | 10.4    | 18.2    | 2.2                  | 3.8                  | 6.6                  | 5.9                | 10.4               | NA                   |
| Ratio                                                     |                   | 0.28    | 0.49    | 0.86    | 0.10                 | 0.18                 | 0.31                 | 0.28               | 0.49               | NA                   |
| Half-life                                                 | 3.2               | 1.5     | 1.5     | 1.5     | 1.5                  | 1.5                  | 1.5                  | 1.5                | 1.5                |                      |
| Ratio                                                     |                   | 0.48    | 0.48    | 0.48    | 0.48                 | 0.48                 | 0.48                 | 0.48               | 0.48               |                      |

The units of AUC, CL, and half-life are  $\mu\text{g}\cdot\text{day}/\text{mL}$ ,  $\text{mL}/\text{day}/\text{kg}$ , and days, respectively. The reported literature PK values for total antibody were for AUC = 2060  $\mu\text{g}\cdot\text{day}/\text{mL}$ , CL = 2.7  $\text{mL}/\text{day}/\text{kg}$ ; and half-life = 19.2 days, respectively. For conjugate, PK values were for AUC = 5.9

$\mu\text{g}\cdot\text{day}/\text{mL}$ ,  $\text{CL} = 11.1 \text{ mL}/\text{day}/\text{kg}$ ; and half-life = 5.3 days, respectively. For unconjugated, the AUC and half-life values were  $23.1 \text{ ng}\cdot\text{day}/\text{mL}$  and 4.2 days, respectively.

Human observed values in the second column is based on digitally extracted human concentration-time data from the reported plots in the literature.

**Table S5: Predicted and observed (human) pharmacokinetic parameters of DSTA4637S from monkey**

| Parameters                                                    | Human<br>Observed | V = 1.0 | V = 0.9 | V = 0.8 | V = 1.0<br>CL = 0.85 | V = 0.9<br>CL = 0.85 | V = 0.8<br>CL = 0.85 | V = 1.0<br>V = 0.8 | V = 0.9<br>V = 0.8 | 1 species<br>scaling |
|---------------------------------------------------------------|-------------------|---------|---------|---------|----------------------|----------------------|----------------------|--------------------|--------------------|----------------------|
| <b>From monkey 1 mg/kg to 5 mg/kg human; Total Antibody</b>   |                   |         |         |         |                      |                      |                      |                    |                    |                      |
| AUC                                                           | 1349              | 862     | 1163    | 1569    | 432                  | 583                  | 786                  | 862                | 1391               | 1471                 |
| Ratio                                                         |                   | 0.64    | 0.86    | 1.16    | 0.32                 | 0.43                 | 0.58                 | 0.64               | 1.03               | 1.09                 |
| Clearance                                                     | 3.7               | 5.8     | 4.3     | 3.2     | 11.6                 | 8.6                  | 6.4                  | 5.8                | 3.6                | 3.4                  |
| Ratio                                                         |                   | 1.57    | 1.16    | 0.86    | 3.13                 | 2.32                 | 1.72                 | 1.57               | 0.97               | 0.92                 |
| Half-life                                                     | 12.9              | 10.0    | 10.0    | 10.0    | 10.0                 | 10.0                 | 10.0                 | 10.0               | 12.4               | 16.5                 |
| Ratio                                                         |                   | 0.78    | 0.78    | 0.78    | 0.78                 | 0.78                 | 0.78                 | 0.78               | 0.96               | 1.28                 |
| <b>From monkey 1 mg/kg to 5 mg/kg human; Conjugate</b>        |                   |         |         |         |                      |                      |                      |                    |                    |                      |
| AUC                                                           | 5.8               | 3.4     | 4.6     | 6.1     | 1.7                  | 2.3                  | 3.1                  | 3.4                | 4.8                | 7.4                  |
| Ratio                                                         |                   | 0.58    | 0.79    | 1.06    | 0.29                 | 0.39                 | 0.53                 | 0.58               | 0.82               | 1.28                 |
| Clearance                                                     | 12.3              | 21.2    | 15.7    | 11.6    | 42.2                 | 31.3                 | 23.2                 | 21.2               | 14.9               | 9.6                  |
| Ratio                                                         |                   | 1.72    | 1.27    | 0.94    | 3.43                 | 2.54                 | 1.89                 | 1.72               | 1.21               | 0.78                 |
| Half-life                                                     | 4.7               | 4.1     | 4.1     | 4.1     | 4.1                  | 4.1                  | 4.1                  | 4.1                | 4.4                | 6.3                  |
| Ratio                                                         |                   | 0.87    | 0.87    | 0.87    | 0.87                 | 0.87                 | 0.87                 | 0.87               | 0.94               | 1.34                 |
| <b>From monkey 150 mg/kg to 150 mg/kg human; unconjugated</b> |                   |         |         |         |                      |                      |                      |                    |                    |                      |
| AUC                                                           | 21.3              | 21.3    | 12.7    | 17.1    | 23.0                 | 8.1                  | 10.9                 | 14.7               | 12.7               | NA                   |
| Ratio                                                         |                   |         | 0.59    | 0.80    | 1.08                 | 0.38                 | 0.51                 | 0.69               | 0.59               | NA                   |
| Half-life                                                     | 3.2               | 3.0     | 3.0     | 3.0     | 3.0                  | 3.0                  | 3.0                  | 3.0                | 3.0                |                      |
| Ratio                                                         |                   | 0.94    | 0.94    | 0.94    | 0.94                 | 0.94                 | 0.94                 | 0.94               | 0.94               |                      |

The units of AUC, CL, and half-life are  $\mu\text{g}\cdot\text{day}/\text{mL}$ ,  $\text{mL}/\text{day}/\text{kg}$ , and days, respectively. The reported literature PK values for total antibody were for AUC =  $2060 \mu\text{g}\cdot\text{day}/\text{mL}$ , CL =  $2.7 \text{ mL}/\text{day}/\text{kg}$ ; and half-life = 19.2 days, respectively. For conjugate, PK values were for AUC = 5.9



$\mu\text{g}\cdot\text{day}/\text{mL}$ ,  $\text{CL} = 11.1 \text{ mL}/\text{day}/\text{kg}$ ; and half-life = 5.3 days, respectively. For unconjugated, the AUC and half-life values were  $23.1 \text{ ng}\cdot\text{day}/\text{mL}$  and 4.2 days, respectively.

Human observed values in the second column is based on digitally extracted human concentration-time data from the reported plots in the literature.

| <b>Table S6: Predicted and observed (human) pharmacokinetic parameters of Trastuzumab-DM1 from rat</b> |                   |         |         |         |                      |                      |                      |                    |                    |                      |
|--------------------------------------------------------------------------------------------------------|-------------------|---------|---------|---------|----------------------|----------------------|----------------------|--------------------|--------------------|----------------------|
| Parameters                                                                                             | Human<br>Observed | V = 1.0 | V = 0.9 | V = 0.8 | V = 1.0<br>CL = 0.85 | V = 0.9<br>CL = 0.85 | V = 0.8<br>CL = 0.85 | V = 1.0<br>V = 0.8 | V = 0.9<br>V = 0.8 | 1 species<br>scaling |
| <b>From rat 3 mg/kg to 3.6 mg/kg human; Total trastuzumab</b>                                          |                   |         |         |         |                      |                      |                      |                    |                    |                      |
| AUC                                                                                                    | 1050              | 318     | 559     | 982     | 133                  | 234                  | 411                  | 815                | 747                | 8780                 |
| Ratio                                                                                                  |                   | 0.30    | 0.53    | 0.94    | 0.13                 | 0.22                 | 0.39                 | 0.78               | 0.71               | 0.84                 |
| Clearance                                                                                              | 3.4               | 11.3    | 6.4     | 3.7     | 27.1                 | 15.4                 | 8.8                  | 4.4                | 4.8                | 4.1                  |
| Ratio                                                                                                  |                   | 3.33    | 1.89    | 1.08    | 7.96                 | 4.53                 | 2.58                 | 1.30               | 1.42               | 1.21                 |
| Half-life                                                                                              | 10.8              | 9.6     | 9.6     | 9.6     | 9.6                  | 9.6                  | 9.6                  | 18.3               | 10.0               | 20.5                 |
| Ratio                                                                                                  |                   | 0.89    | 0.89    | 0.89    | 0.89                 | 0.89                 | 0.89                 | 1.70               | 0.93               | 1.90                 |
| <b>From rat 3 mg/kg to 3.6 mg/kg human; trastuzumab-DM1 (TDM1)</b>                                     |                   |         |         |         |                      |                      |                      |                    |                    |                      |
| AUC                                                                                                    | 293               | 163     | 286     | 503     | 68                   | 120                  | 210                  | 206                | 314                | 456                  |
| Ratio                                                                                                  |                   | 0.56    | 0.98    | 1.72    | 0.23                 | 0.41                 | 0.72                 | 0.70               | 1.07               | 1.56                 |
| Clearance                                                                                              | 12.3              | 22.1    | 12.6    | 7.2     | 52.9                 | 30.1                 | 17.1                 | 17.5               | 11.5               | 7.9                  |
| Ratio                                                                                                  |                   | 1.80    | 1.02    | 0.58    | 4.30                 | 2.45                 | 1.39                 | 1.42               | 0.93               | 0.64                 |
| Half-life                                                                                              | 4.8               | 5.5     | 5.5     | 5.5     | 5.5                  | 5.5                  | 5.5                  | 6.7                | 5.2                | 11.1                 |
| Ratio                                                                                                  |                   | 1.14    | 1.14    | 1.14    | 1.14                 | 1.14                 | 1.14                 | 1.40               | 1.07               | 2.31                 |

The units of AUC, CL, and half-life are  $\mu\text{g} \cdot \text{day}/\text{mL}$ ,  $\text{mL}/\text{day}/\text{kg}$ , and days, respectively. The reported literature PK values for total trastuzumab were for AUC =  $1270 \mu\text{g} \cdot \text{day}/\text{mL}$ , CL =  $3.3 \text{ mL}/\text{day}/\text{kg}$ ; and half-life = 12.5 days, respectively.

For TDM1, PK values were AUC =  $295 \mu\text{g} \cdot \text{day}/\text{mL}$ , CL =  $12.9 \text{ mL}/\text{day}/\text{kg}$ ; and half-life = 3.5 days, respectively.

Human observed values in the second column is based on digitally extracted human concentration-time data from the reported plots in the literature.

**Table S7: Predicted and observed (human) pharmacokinetic parameters of Trastuzumab-DM1 from monkey**

| Parameters                                                             | Human    |         |         |         | V = 1.0   | V = 0.9   | V = 0.8   | V = 1.0 | V = 0.9 | 1 species |
|------------------------------------------------------------------------|----------|---------|---------|---------|-----------|-----------|-----------|---------|---------|-----------|
|                                                                        | Observed | V = 1.0 | V = 0.9 | V = 0.8 | CL = 0.85 | CL = 0.85 | CL = 0.85 | V = 0.8 | V = 0.8 | scaling   |
| <b>From monkey 30 mg/kg to 3.6 mg/kg human; Total trastuzumab</b>      |          |         |         |         |           |           |           |         |         |           |
| AUC                                                                    | 1050     | 642     | 866     | 1169    | 563       | 760       | 1025      | 1790    | 1168    | 1000      |
| Ratio                                                                  |          | 0.61    | 0.83    | 1.11    | 0.54      | 0.72      | 0.98      | 1.70    | 1.11    | 0.95      |
| Clearance                                                              | 3.4      | 5.6     | 4.2     | 3.1     | 6.4       | 4.7       | 3.5       | 2.0     | 3.1     | 3.6       |
| Ratio                                                                  |          | 1.65    | 1.22    | 0.91    | 1.88      | 1.39      | 1.03      | 0.59    | 0.91    | 1.06      |
| Half-life                                                              | 10.8     | 10.5    | 10.5    | 10.5    | 10.5      | 10.5      | 10.5      | 41.0    | 16.7    | 16.5      |
| Ratio                                                                  |          | 0.97    | 0.97    | 0.97    | 0.97      | 0.97      | 0.97      | 3.80    | 1.54    | 1.53      |
| <b>From monkey 30 mg/kg to 3.6 mg/kg human; trastuzumab-DM1 (TDM1)</b> |          |         |         |         |           |           |           |         |         |           |
| AUC                                                                    | 293      | 236     | 319     | 430     | 207       | 279       | 377       | 259     | 332     | 474       |
| Ratio                                                                  |          | 0.81    | 1.09    | 1.47    | 0.71      | 0.95      | 1.29      | 0.88    | 1.13    | 1.62      |
| Clearance                                                              | 12.3     | 15.2    | 11.3    | 8.4     | 17.4      | 12.9      | 9.5       | 13.9    | 10.9    | 7.6       |
| Ratio                                                                  |          | 1.24    | 0.92    | 0.68    | 1.41      | 1.05      | 0.78      | 1.13    | 0.88    | 0.62      |
| Half-life                                                              | 4.8      | 5.8     | 5.8     | 5.8     | 5.8       | 5.8       | 5.8       | 9.7     | 6.2     | 8.2       |
| Ratio                                                                  |          | 1.20    | 1.20    | 1.20    | 1.20      | 1.20      | 1.20      | 2.03    | 1.29    | 1.71      |

The units of AUC, CL, and half-life are  $\mu\text{g}\cdot\text{day}/\text{mL}$ ,  $\text{mL}/\text{day}/\text{kg}$ , and days, respectively. The reported literature PK values for total trastuzumab were for AUC =  $1270 \mu\text{g}\cdot\text{day}/\text{mL}$ , CL =  $3.3 \text{ mL}/\text{day}/\text{kg}$ ; and half-life = 12.5 days, respectively.

For TDM1, PK values were AUC =  $295 \mu\text{g}\cdot\text{day}/\text{mL}$ , CL =  $12.9 \text{ mL}/\text{day}/\text{kg}$ ; and half-life = 3.5 days, respectively.

Human observed values in the second column is based on digitally extracted human concentration-time data from the reported plots in the literature.

**Table S8: Predicted versus observed PK parameters within different ranges for different methods for monkey**

| Range                          | V = 1.0 | V = 0.9 | V = 0.8 | V = 1.0<br>CL = 0.85 | V = 0.9<br>CL = 0.85 | V = 0.8<br>CL = 0.85 | V = 1.0<br>V = 0.8 | V = 0.9<br>V = 0.8 | 1 species<br>scaling |
|--------------------------------|---------|---------|---------|----------------------|----------------------|----------------------|--------------------|--------------------|----------------------|
| <b>AUC (total) n = 5</b>       |         |         |         |                      |                      |                      |                    |                    |                      |
| Ratios                         | 0.60    | 0.81    | 1.10    | 0.34                 | 0.45                 | 0.61                 | 0.69               | 0.86               | 1.05                 |
|                                | 0.57    | 0.76    | 1.03    | 0.34                 | 0.46                 | 0.62                 | 1.03               | 0.79               | 1.29                 |
|                                | 0.42    | 0.56    | 0.76    | 0.24                 | 0.32                 | 0.43                 | 0.42               | 0.58               | 0.69                 |
|                                | 0.64    | 0.86    | 1.16    | 0.32                 | 0.43                 | 0.58                 | 0.64               | 1.03               | 1.09                 |
|                                | 0.61    | 0.83    | 1.11    | 0.54                 | 0.72                 | 0.98                 | 1.70               | 1.11               | 0.95                 |
| <0.5                           | 1       | 0       | 0       | 5                    | 5                    | 1                    | 1                  | 0                  | 0                    |
| >2.0                           | 0       | 0       | 0       | 0                    | 0                    | 0                    | 0                  | 0                  | 0                    |
| 0.5-1.5                        | 4       | 5       | 5       | 0                    | 0                    | 4                    | 4                  | 5                  | 5                    |
| 0.7-1.3                        | 0       | 4       | 5       | 0                    | 0                    | 1                    | 1                  | 4                  | 4                    |
| <b>Clearance (total) n = 5</b> |         |         |         |                      |                      |                      |                    |                    |                      |
| Ratios                         | 1.66    | 1.23    | 0.91    | 2.97                 | 2.20                 | 1.63                 | 1.45               | 1.16               | 0.96                 |
|                                | 1.76    | 1.30    | 0.97    | 2.91                 | 2.16                 | 1.60                 | 0.97               | 1.26               | 0.78                 |
|                                | 2.41    | 1.78    | 1.32    | 4.23                 | 3.13                 | 2.32                 | 2.41               | 1.72               | 1.46                 |
|                                | 1.57    | 1.16    | 0.86    | 3.13                 | 2.32                 | 1.72                 | 1.57               | 0.97               | 0.92                 |
|                                | 1.65    | 1.22    | 0.91    | 1.88                 | 1.39                 | 1.03                 | 0.59               | 0.91               | 1.06                 |
| <0.5                           | 0       | 0       | 0       | 0                    | 0                    | 0                    | 0                  | 0                  | 0                    |
| >2.0                           | 1       | 0       | 0       | 0                    | 0                    | 0                    | 1                  | 0                  | 0                    |
| 0.5-1.5                        | 0       | 4       | 5       | 0                    | 1                    | 1                    | 3                  | 4                  | 5                    |
| 0.7-1.3                        | 0       | 4       | 4       | 0                    | 0                    | 1                    | 1                  | 4                  | 4                    |
| <b>Half-life (total) n = 5</b> |         |         |         |                      |                      |                      |                    |                    |                      |
| Ratios                         | 1.00    | 1.00    | 1.00    | 1.00                 | 1.00                 | 1.00                 | 1.62               | 1.23               | 1.88                 |
|                                | 0.86    | 0.86    | 0.86    | 0.86                 | 0.86                 | 0.86                 | 0.86               | 0.98               | 1.29                 |
|                                | 0.60    | 0.60    | 0.60    | 0.60                 | 0.60                 | 0.60                 | 0.60               | 0.69               | 0.85                 |
|                                | 0.78    | 0.78    | 0.78    | 0.78                 | 0.78                 | 0.78                 | 0.78               | 0.96               | 1.28                 |
|                                | 0.97    | 0.97    | 0.97    | 0.97                 | 0.97                 | 0.97                 | 3.80               | 1.54               | 1.53                 |

**Table S8 continued**

| Range                              | V = 1.0 | V = 0.9 | V = 0.8 | V = 1.0<br>CL = 0.85 | V = 0.9<br>CL = 0.85 | V = 0.8<br>CL = 0.85 | V = 1.0<br>V = 0.8 | V = 0.9<br>V = 0.8 | 1 species<br>scaling |
|------------------------------------|---------|---------|---------|----------------------|----------------------|----------------------|--------------------|--------------------|----------------------|
| <b>Half-life (total) n = 5</b>     |         |         |         |                      |                      |                      |                    |                    |                      |
| <0.5                               | 0       | 0       | 0       | 0                    | 0                    | 0                    | 0                  | 0                  | 0                    |
| >2.0                               | 0       | 0       | 0       | 0                    | 0                    | 0                    | 1                  | 0                  | 0                    |
| 0.5-1.5                            | 5       | 5       | 5       | 5                    | 5                    | 5                    | 4                  | 4                  | 3                    |
| 0.7-1.3                            | 4       | 4       | 4       | 4                    | 4                    | 4                    | 2                  | 3                  | 3                    |
| <b>AUC (conjugate) n = 3</b>       |         |         |         |                      |                      |                      |                    |                    |                      |
| Ratios                             | 0.78    | 1.06    | 1.43    | 0.47                 | 0.64                 | 0.86                 | 1.15               | 1.23               | 1.1                  |
|                                    | 0.58    | 0.79    | 1.06    | 0.29                 | 0.39                 | 0.53                 | 0.58               | 0.82               | 1.28                 |
|                                    | 0.81    | 1.09    | 1.47    | 0.71                 | 0.95                 | 1.29                 | 0.88               | 1.13               | 1.62                 |
| <0.5                               | 0       | 0       | 0       | 2                    | 1                    | 0                    | 1                  | 0                  | 0                    |
| >2.0                               | 0       | 0       | 0       | 0                    | 0                    | 0                    | 0                  | 0                  | 0                    |
| 0.5-1.5                            | 3       | 3       | 3       | 1                    | 2                    | 2                    | 3                  | 3                  | 2                    |
| 0.7-1.3                            | 2       | 3       | 1       | 1                    | 1                    | 2                    | 2                  | 3                  | 2                    |
| <b>Clearance (conjugate) n = 3</b> |         |         |         |                      |                      |                      |                    |                    |                      |
| Ratios                             | 1.28    | 0.95    | 0.70    | 2.12                 | 1.57                 | 1.17                 | 0.87               | 0.82               | 0.91                 |
|                                    | 1.72    | 1.28    | 0.95    | 3.44                 | 2.55                 | 1.89                 | 1.72               | 1.22               | 0.78                 |
|                                    | 1.24    | 0.92    | 0.68    | 1.41                 | 1.05                 | 0.78                 | 1.13               | 0.88               | 0.62                 |
| <0.5                               | 0       | 0       | 0       | 0                    | 0                    | 0                    | 0                  | 0                  | 0                    |
| >2.0                               | 0       | 0       | 0       | 2                    | 1                    | 0                    | 0                  | 0                  | 0                    |
| 0.5-1.5                            | 2       | 3       | 3       | 1                    | 1                    | 2                    | 2                  | 3                  | 3                    |
| 0.7-1.3                            | 2       | 3       | 3       | 0                    | 1                    | 2                    | 2                  | 3                  | 2                    |

Table S8 continued

[illegible]

**Table S9: Predicted versus observed PK parameters within different ranges for different methods for rat**

[illegible]

[illegible]
